# Supplementary material
Source: PubMed Central journal article supplement (PMC3410648)
Supplement: NIHMS393401-supplement-table_s1.pdf [file NIHMS393401-supplement-table_s1.pdf]

## supplement

**Table 1.** Ingredients of Experimental Diets\*

| Ingredient                         | <u><math>\omega</math>-6 diet</u> |             | <u><math>\omega</math>-3 diet</u> |             |
|------------------------------------|-----------------------------------|-------------|-----------------------------------|-------------|
|                                    | Grams                             | % of energy | Grams                             | % of energy |
| Manhaden Oil                       | 0                                 | 0           | 57.2                              | 13.7        |
| Corn Oil                           | 83.3                              | 20.0        | 26.1                              | 6.3         |
| Casein                             | 200.0                             | 19.1        | 200.0                             | 19.1        |
| Corn Starch                        | 243.7                             | 23.4        | 243.7                             | 23.4        |
| Karo Syrup                         | 137.0                             | 10.6        | 137.0                             | 10.6        |
| Sucrose                            | 120.0                             | 12.8        | 120.0                             | 12.8        |
| Dyetrose <sup>+</sup>              | 105.0                             | 10.6        | 105.0                             | 10.6        |
| Cellulose                          | 50.0                              | 0           | 50.0                              | 0           |
| L-Cystine                          | 3.0                               | 0.3         | 3.0                               | 0.3         |
| L-Methionine                       | 1.6                               | 0.2         | 1.6                               | 0.2         |
| tBHQ                               | 0.03                              | 0           | 0.03                              | 0           |
| Choline Chloride                   | 1.4                               | 0           | 1.4                               | 0           |
| AIN-95G mineral mix <sup>**</sup>  | 35.0                              | 0.8         | 35.0                              | 0.8         |
| AIN-93VX vitamin mix <sup>**</sup> | 10.0                              | 1.0         | 10.0                              | 1.0         |
| AIN-93G Supplement <sup>**</sup>   | 10                                | 1.0         | 10.0                              | 1.0         |
| Total grams                        | 1000                              |             | 1000                              |             |

\*: Three experimental diets were formulated containing varying amounts of menhaden oil and corn oil as source of fat

+: Deploymerized cornstarch used to pelletize diets.

\*\* : See Reference (33)
